# Supplementary material
Source: publisher figshare collection journal article supplement (https://gsajournals.figshare.com/ndownloader/files/25320710)
Supplement: Supplementary file 1 [file 25320710]

## Sheet: Reactome_enrichment_HHLT-GAL4
#term ID	term description	observed gene count	background gene count	false discovery rate	matching proteins in your network (IDs)	matching proteins in your network (labels)
DME-392499	Metabolism of proteins	42	927	1.96e-14	FBpp0070430,FBpp0070457,FBpp0070672,FBpp0071905,FBpp0072081,FBpp0073659,FBpp0074609,FBpp0074841,FBpp0076806,FBpp0077208,FBpp0077473,FBpp0078326,FBpp0078664,FBpp0079680,FBpp0080048,FBpp0082137,FBpp0082568,FBpp0082743,FBpp0082787,FBpp0082964,FBpp0082994,FBpp0083434,FBpp0083658,FBpp0083683,FBpp0083975,FBpp0084351,FBpp0085658,FBpp0085888,FBpp0086603,FBpp0086705,FBpp0087921,FBpp0089041,FBpp0089084,FBp…	Atg6,CG3806,CG6094,CG7794,CG8636,CSN1b,CSN5,CSN6,Cctgamma,Cul1,EF2,Elf,Exo84,Nup214,Nup93-1,Prosalpha7,Rab35,Rab5,Rep,Rpn11,Rpn6,Sec23,Sec5,Sec6,Sec8,Slh,T-cp1,TER94,Tango7,alien,alphaSnap,beta'COP,ctp,eIF-1A,eIF-5A,eIF2B-beta,eIF5B,eRF1,ldlCp,mbo,scny,slmb
DME-199991	Membrane Trafficking	25	359	8.76e-12	FBpp0070672,FBpp0073966,FBpp0074609,FBpp0074841,FBpp0077473,FBpp0080048,FBpp0082516,FBpp0082568,FBpp0082682,FBpp0082743,FBpp0082964,FBpp0083502,FBpp0083646,FBpp0083658,FBpp0084050,FBpp0085658,FBpp0086941,FBpp0088945,FBpp0089084,FBpp0291363,FBpp0301099,FBpp0303869,FBpp0305729,FBpp0305866,FBpp0306056	AP-2alpha,AP-2mu,AP-2sigma,Akt1,Amph,CG7794,CSN1b,CSN5,CSN6,Chc,Hsc70-4,Rab35,Rab5,Rep,Sec23,Slh,Snmp1,Syx18,alien,alphaSnap,beta'COP,ctp,ldlCp,mgl,shi
DME-8856828	Clathrin-mediated endocytosis	14	109	1.64e-09	FBpp0073966,FBpp0074841,FBpp0077473,FBpp0082516,FBpp0082743,FBpp0083502,FBpp0083646,FBpp0083658,FBpp0086941,FBpp0088945,FBpp0291363,FBpp0303869,FBpp0305866,FBpp0306056	AP-2alpha,AP-2mu,AP-2sigma,Amph,CSN1b,CSN5,CSN6,Chc,Hsc70-4,Rab5,Snmp1,alien,mgl,shi
DME-597592	Post-translational protein modification	27	651	3.01e-08	FBpp0070672,FBpp0071905,FBpp0072081,FBpp0073659,FBpp0074609,FBpp0074841,FBpp0076806,FBpp0077473,FBpp0078664,FBpp0080048,FBpp0082137,FBpp0082568,FBpp0082743,FBpp0082964,FBpp0083434,FBpp0083658,FBpp0083975,FBpp0085658,FBpp0086603,FBpp0087921,FBpp0089041,FBpp0089084,FBpp0111818,FBpp0301099,FBpp0303869,FBpp0305182,FBpp0305729	Atg6,CG7794,CSN1b,CSN5,CSN6,Cul1,EF2,Nup214,Nup93-1,Prosalpha7,Rab35,Rab5,Rep,Rpn11,Rpn6,Sec23,Slh,TER94,alien,alphaSnap,beta'COP,ctp,eIF-5A,ldlCp,mbo,scny,slmb
DME-162582	Signal Transduction	29	767	4e-08	FBpp0071061,FBpp0071848,FBpp0072306,FBpp0073173,FBpp0073966,FBpp0076487,FBpp0077941,FBpp0078664,FBpp0079278,FBpp0079677,FBpp0079999,FBpp0080121,FBpp0082139,FBpp0082682,FBpp0083434,FBpp0083502,FBpp0083646,FBpp0085182,FBpp0085295,FBpp0086382,FBpp0086603,FBpp0086853,FBpp0087921,FBpp0088945,FBpp0089041,FBpp0099728,FBpp0111818,FBpp0290803,FBpp0300511	AP-2alpha,AP-2mu,AP-2sigma,Akt1,Cdk9,Chc,Cul1,CycK,Dop1R1,Dp,Prosalpha7,RpII33,Rpd3,Rpn11,Rpn6,SNF4Agamma,TER94,Vha55,Vha68-2,chico,emb,fabp,kek6,kni,mys,pbl,shark,slmb,zip
DME-69278	Cell Cycle, Mitotic	16	232	1.62e-07	FBpp0071905,FBpp0073173,FBpp0073659,FBpp0073893,FBpp0078664,FBpp0079278,FBpp0082137,FBpp0083434,FBpp0084831,FBpp0085619,FBpp0086591,FBpp0086603,FBpp0086853,FBpp0087921,FBpp0089041,FBpp0305561	Bub3,Cdc27,Cul1,Dp,Nup214,Nup93-1,PCNA,Prosalpha7,Rpd3,Rpn11,Rpn6,SMC2,emb,mbo,shtd,slmb
DME-74160	Gene expression (Transcription)	22	508	4.33e-07	FBpp0071848,FBpp0071905,FBpp0073173,FBpp0073572,FBpp0073659,FBpp0076408,FBpp0076433,FBpp0077941,FBpp0078013,FBpp0078664,FBpp0080121,FBpp0082137,FBpp0082682,FBpp0084726,FBpp0085295,FBpp0085658,FBpp0086603,FBpp0086853,FBpp0087921,FBpp0089041,FBpp0290803,FBpp0294043	AGO1,Akt1,Bap60,CG7185,Cdk12,Cdk9,Cpsf100,Cul1,CycK,Dp,Nup214,Nup93-1,Prosalpha7,Rep,RpII33,Rpd3,Rpn11,Rpn6,SNF4Agamma,kni,mbo,msk
DME-8953854	Metabolism of RNA	21	487	9.52e-07	FBpp0070402,FBpp0071046,FBpp0071905,FBpp0073659,FBpp0073828,FBpp0076433,FBpp0078664,FBpp0080121,FBpp0080622,FBpp0081484,FBpp0082137,FBpp0082516,FBpp0082682,FBpp0082817,FBpp0084144,FBpp0084726,FBpp0085902,FBpp0086603,FBpp0089041,FBpp0304202,FBpp0305302	Akt1,CG10333,CG11920,CG11985,CG16941,CG6227,CG7185,Cpsf100,Elf,Hsc70-4,Nup214,Nup93-1,Prosalpha7,Prp19,RpII33,Rpn11,Rpn6,bys,crn,eRF1,mbo
DME-8856825	Cargo recognition for clathrin-mediated endocytosis	10	84	1.08e-06	FBpp0073966,FBpp0074841,FBpp0082743,FBpp0083502,FBpp0083646,FBpp0083658,FBpp0088945,FBpp0291363,FBpp0303869,FBpp0306056	AP-2alpha,AP-2mu,AP-2sigma,CSN1b,CSN5,CSN6,Chc,Snmp1,alien,mgl
DME-168256	Immune System	26	772	1.8e-06	FBpp0070672,FBpp0071061,FBpp0073893,FBpp0077473,FBpp0078013,FBpp0078664,FBpp0079999,FBpp0082139,FBpp0082516,FBpp0082682,FBpp0083434,FBpp0086382,FBpp0086603,FBpp0087248,FBpp0087921,FBpp0089041,FBpp0099728,FBpp0111818,FBpp0292260,FBpp0293235,FBpp0294035,FBpp0301099,FBpp0302752,FBpp0305182,FBpp0305561,FBpp0306056	Akt1,Cdc27,Cdk12,Cul1,EF2,Fs(2)Ket,Hsc70-4,Nup358,Prosalpha7,Rab5,Rop,Rpn11,Rpn6,Sec23,Snmp1,Syx1A,TER94,Tsp47F,Vha55,Vha68-2,ctp,fabp,mys,shark,shtd,slmb
DME-437239	Recycling pathway of L1	5	11	1.19e-05	FBpp0073966,FBpp0083502,FBpp0083646,FBpp0088945,FBpp0305866	AP-2alpha,AP-2mu,AP-2sigma,Chc,shi
DME-72203	Processing of Capped Intron-Containing Pre-mRNA	13	218	1.35e-05	FBpp0070402,FBpp0071905,FBpp0073659,FBpp0073828,FBpp0076433,FBpp0080121,FBpp0080622,FBpp0081484,FBpp0082137,FBpp0082516,FBpp0082817,FBpp0084726,FBpp0085902	CG10333,CG11985,CG16941,CG6227,CG7185,Cpsf100,Hsc70-4,Nup214,Nup93-1,Prp19,RpII33,crn,mbo
DME-373760	L1CAM interactions	6	25	1.46e-05	FBpp0071061,FBpp0073966,FBpp0083502,FBpp0083646,FBpp0088945,FBpp0305866	AP-2alpha,AP-2mu,AP-2sigma,Chc,mys,shi
DME-8953897	Cellular responses to external stimuli	14	265	1.67e-05	FBpp0070672,FBpp0071905,FBpp0073659,FBpp0073893,FBpp0074822,FBpp0078664,FBpp0082137,FBpp0082516,FBpp0082964,FBpp0083975,FBpp0086603,FBpp0089041,FBpp0290803,FBpp0305561	Atg3,Atg6,CG7794,Cdc27,Hsc70-4,Nup214,Nup93-1,Prosalpha7,Rpn11,Rpn6,SNF4Agamma,ctp,mbo,shtd
DME-195721	Signaling by WNT	11	158	2.18e-05	FBpp0073173,FBpp0073966,FBpp0078664,FBpp0079278,FBpp0083434,FBpp0083502,FBpp0083646,FBpp0086603,FBpp0087921,FBpp0088945,FBpp0089041	AP-2alpha,AP-2mu,AP-2sigma,Chc,Cul1,Prosalpha7,Rpd3,Rpn11,Rpn6,emb,slmb
DME-212436	Generic Transcription Pathway	15	343	5.57e-05	FBpp0071848,FBpp0073173,FBpp0073572,FBpp0077941,FBpp0078013,FBpp0078664,FBpp0080121,FBpp0082682,FBpp0085295,FBpp0085658,FBpp0086603,FBpp0086853,FBpp0087921,FBpp0089041,FBpp0290803	Akt1,Bap60,Cdk12,Cdk9,Cul1,CycK,Dp,Prosalpha7,Rep,RpII33,Rpd3,Rpn11,Rpn6,SNF4Agamma,kni
DME-176408	Regulation of APC/C activators between G1/S and early anaphase	8	85	8.38e-05	FBpp0073893,FBpp0078664,FBpp0083434,FBpp0084831,FBpp0086603,FBpp0087921,FBpp0089041,FBpp0305561	Bub3,Cdc27,Cul1,Prosalpha7,Rpn11,Rpn6,shtd,slmb
DME-73857	RNA Polymerase II Transcription	17	456	8.38e-05	FBpp0071848,FBpp0073173,FBpp0073572,FBpp0076433,FBpp0077941,FBpp0078013,FBpp0078664,FBpp0080121,FBpp0082682,FBpp0084726,FBpp0085295,FBpp0085658,FBpp0086603,FBpp0086853,FBpp0087921,FBpp0089041,FBpp0290803	Akt1,Bap60,CG7185,Cdk12,Cdk9,Cpsf100,Cul1,CycK,Dp,Prosalpha7,Rep,RpII33,Rpd3,Rpn11,Rpn6,SNF4Agamma,kni
DME-168249	Innate Immune System	19	574	0.00011	FBpp0070672,FBpp0071061,FBpp0077473,FBpp0078013,FBpp0078664,FBpp0079999,FBpp0082139,FBpp0082516,FBpp0083434,FBpp0086603,FBpp0087248,FBpp0087921,FBpp0089041,FBpp0099728,FBpp0111818,FBpp0293235,FBpp0294035,FBpp0305182,FBpp0306056	Cdk12,Cul1,EF2,Fs(2)Ket,Hsc70-4,Nup358,Prosalpha7,Rab5,Rpn11,Rpn6,Snmp1,TER94,Tsp47F,Vha55,Vha68-2,ctp,fabp,mys,slmb
DME-8866427	VLDLR internalisation and degradation	4	9	0.00011	FBpp0073966,FBpp0083502,FBpp0083646,FBpp0088945	AP-2alpha,AP-2mu,AP-2sigma,Chc
DME-6781827	Transcription-Coupled Nucleotide Excision Repair (TC-NER)	7	67	0.00014	FBpp0074841,FBpp0080121,FBpp0082743,FBpp0083658,FBpp0085619,FBpp0085902,FBpp0303869	CSN1b,CSN5,CSN6,PCNA,Prp19,RpII33,alien
DME-264876	Insulin processing	4	10	0.00015	FBpp0077208,FBpp0078326,FBpp0084351,FBpp0085888	Exo84,Sec5,Sec6,Sec8
DME-72163	mRNA Splicing - Major Pathway	10	169	0.00017	FBpp0070402,FBpp0073828,FBpp0076433,FBpp0080121,FBpp0080622,FBpp0081484,FBpp0082516,FBpp0082817,FBpp0084726,FBpp0085902	CG10333,CG11985,CG16941,CG6227,CG7185,Cpsf100,Hsc70-4,Prp19,RpII33,crn
DME-1266738	Developmental Biology	9	136	0.00018	FBpp0071061,FBpp0073966,FBpp0077941,FBpp0082682,FBpp0083502,FBpp0083646,FBpp0088945,FBpp0112080,FBpp0305866	AP-2alpha,AP-2mu,AP-2sigma,Akt1,CG10663,Chc,kni,mys,shi
DME-4086400	PCP/CE pathway	7	73	0.00018	FBpp0073966,FBpp0078664,FBpp0083502,FBpp0083646,FBpp0086603,FBpp0088945,FBpp0089041	AP-2alpha,AP-2mu,AP-2sigma,Chc,Prosalpha7,Rpn11,Rpn6
DME-5099900	WNT5A-dependent internalization of FZD4	4	11	0.00018	FBpp0073966,FBpp0083502,FBpp0083646,FBpp0088945	AP-2alpha,AP-2mu,AP-2sigma,Chc
DME-8964038	LDL clearance	4	11	0.00018	FBpp0073966,FBpp0083502,FBpp0083646,FBpp0088945	AP-2alpha,AP-2mu,AP-2sigma,Chc
DME-6781823	Formation of TC-NER Pre-Incision Complex	6	48	0.00019	FBpp0074841,FBpp0080121,FBpp0082743,FBpp0083658,FBpp0085902,FBpp0303869	CSN1b,CSN5,CSN6,Prp19,RpII33,alien
DME-2262752	Cellular responses to stress	11	223	0.00023	FBpp0070672,FBpp0071905,FBpp0073659,FBpp0073893,FBpp0078664,FBpp0082137,FBpp0082516,FBpp0082964,FBpp0086603,FBpp0089041,FBpp0305561	CG7794,Cdc27,Hsc70-4,Nup214,Nup93-1,Prosalpha7,Rpn11,Rpn6,ctp,mbo,shtd
DME-5578749	Transcriptional regulation by small RNAs	6	50	0.00023	FBpp0071905,FBpp0073659,FBpp0076408,FBpp0080121,FBpp0082137,FBpp0294043	AGO1,Nup214,Nup93-1,RpII33,mbo,msk
DME-8951664	Neddylation	9	142	0.00023	FBpp0074841,FBpp0078664,FBpp0082743,FBpp0083434,FBpp0083658,FBpp0086603,FBpp0087921,FBpp0089041,FBpp0303869	CSN1b,CSN5,CSN6,Cul1,Prosalpha7,Rpn11,Rpn6,alien,slmb
DME-73894	DNA Repair	9	150	0.0003	FBpp0074841,FBpp0080121,FBpp0082743,FBpp0083658,FBpp0085619,FBpp0085902,FBpp0087756,FBpp0111818,FBpp0303869	CSN1b,CSN5,CSN6,FANCI,PCNA,Prp19,RpII33,TER94,alien
DME-199977	ER to Golgi Anterograde Transport	7	86	0.00039	FBpp0070672,FBpp0074609,FBpp0080048,FBpp0082568,FBpp0082964,FBpp0089084,FBpp0301099	CG7794,Sec23,Slh,alphaSnap,beta'COP,ctp,ldlCp
DME-196025	Formation of annular gap junctions	3	5	0.00054	FBpp0073966,FBpp0083646,FBpp0305866	AP-2mu,Chc,shi
DME-449147	Signaling by Interleukins	8	127	0.00055	FBpp0078664,FBpp0083434,FBpp0086382,FBpp0086603,FBpp0087921,FBpp0089041,FBpp0292260,FBpp0302752	Cul1,Prosalpha7,Rop,Rpn11,Rpn6,Syx1A,shark,slmb
DME-72766	Translation	10	209	0.00058	FBpp0070430,FBpp0070457,FBpp0079680,FBpp0082994,FBpp0086705,FBpp0089217,FBpp0301570,FBpp0304202,FBpp0305182,FBpp0305302	CG3806,CG6094,CG8636,EF2,Elf,Tango7,eIF-1A,eIF2B-beta,eIF5B,eRF1
DME-6798695	Neutrophil degranulation	14	408	0.00064	FBpp0070672,FBpp0071061,FBpp0077473,FBpp0078013,FBpp0078664,FBpp0082516,FBpp0086603,FBpp0087248,FBpp0099728,FBpp0111818,FBpp0293235,FBpp0294035,FBpp0305182,FBpp0306056	Cdk12,EF2,Fs(2)Ket,Hsc70-4,Nup358,Rab5,Rpn11,Rpn6,Snmp1,TER94,Tsp47F,ctp,fabp,mys
DME-983169	Class I MHC mediated antigen processing & presentation	10	216	0.00072	FBpp0071061,FBpp0073893,FBpp0078664,FBpp0083434,FBpp0086603,FBpp0087921,FBpp0089041,FBpp0301099,FBpp0305561,FBpp0306056	Cdc27,Cul1,Prosalpha7,Rpn11,Rpn6,Sec23,Snmp1,mys,shtd,slmb
DME-5620916	VxPx cargo-targeting to cilium	4	21	0.00085	FBpp0077208,FBpp0078326,FBpp0084351,FBpp0085888	Exo84,Sec5,Sec6,Sec8
DME-109582	Hemostasis	10	225	0.00089	FBpp0071061,FBpp0073173,FBpp0077134,FBpp0077473,FBpp0082682,FBpp0086382,FBpp0087248,FBpp0293235,FBpp0302752,FBpp0306056	Akt1,HP6,Nup358,Rab5,Rop,Rpd3,Snmp1,Tsp47F,mys,shark
DME-3700989	Transcriptional Regulation by TP53	7	104	0.0009	FBpp0071848,FBpp0078013,FBpp0080121,FBpp0082682,FBpp0085295,FBpp0085658,FBpp0290803	Akt1,Cdk12,Cdk9,CycK,Rep,RpII33,SNF4Agamma
DME-174184	Cdc20:Phospho-APC/C mediated degradation of Cyclin A	6	74	0.0011	FBpp0073893,FBpp0078664,FBpp0084831,FBpp0086603,FBpp0089041,FBpp0305561	Bub3,Cdc27,Prosalpha7,Rpn11,Rpn6,shtd
DME-1280218	Adaptive Immune System	11	285	0.0012	FBpp0071061,FBpp0073893,FBpp0078664,FBpp0082682,FBpp0083434,FBpp0086603,FBpp0087921,FBpp0089041,FBpp0301099,FBpp0305561,FBpp0306056	Akt1,Cdc27,Cul1,Prosalpha7,Rpn11,Rpn6,Sec23,Snmp1,mys,shtd,slmb
DME-416993	Trafficking of GluR2-containing AMPA receptors	3	10	0.0018	FBpp0083502,FBpp0083646,FBpp0088945	AP-2alpha,AP-2mu,AP-2sigma
DME-69239	Synthesis of DNA	7	123	0.002	FBpp0073893,FBpp0078664,FBpp0085619,FBpp0086603,FBpp0087921,FBpp0089041,FBpp0305561	Cdc27,Cul1,PCNA,Prosalpha7,Rpn11,Rpn6,shtd
DME-5252538	Drosophila signaling pathways	8	168	0.0022	FBpp0072306,FBpp0073173,FBpp0078664,FBpp0079677,FBpp0082682,FBpp0086603,FBpp0087921,FBpp0089041	Akt1,Cul1,Prosalpha7,Rpd3,Rpn11,Rpn6,chico,zip
DME-446203	Asparagine N-linked glycosylation	8	172	0.0025	FBpp0070672,FBpp0074609,FBpp0080048,FBpp0082568,FBpp0082964,FBpp0089084,FBpp0111818,FBpp0301099	CG7794,Sec23,Slh,TER94,alphaSnap,beta'COP,ctp,ldlCp
DME-5696394	DNA Damage Recognition in GG-NER	4	32	0.0026	FBpp0074841,FBpp0082743,FBpp0083658,FBpp0303869	CSN1b,CSN5,CSN6,alien
DME-6807878	COPI-mediated anterograde transport	5	61	0.0029	FBpp0070672,FBpp0074609,FBpp0080048,FBpp0082568,FBpp0082964	CG7794,alphaSnap,beta'COP,ctp,ldlCp
DME-69052	Switching of origins to a post-replicative state	6	96	0.003	FBpp0073893,FBpp0078664,FBpp0086603,FBpp0087921,FBpp0089041,FBpp0305561	Cdc27,Cul1,Prosalpha7,Rpn11,Rpn6,shtd
DME-174113	SCF-beta-TrCP mediated degradation of Emi1	5	64	0.0035	FBpp0078664,FBpp0083434,FBpp0086603,FBpp0087921,FBpp0089041	Cul1,Prosalpha7,Rpn11,Rpn6,slmb
DME-2173793	Transcriptional activity of SMAD2/SMAD3:SMAD4 heterotrimer	4	36	0.0037	FBpp0071848,FBpp0073173,FBpp0085295,FBpp0086853	Cdk9,CycK,Dp,Rpd3
DME-8856688	Golgi-to-ER retrograde transport	5	65	0.0037	FBpp0070672,FBpp0074609,FBpp0080048,FBpp0082964,FBpp0084050	CG7794,Syx18,alphaSnap,beta'COP,ctp
DME-1236975	Antigen processing-Cross presentation	5	66	0.0038	FBpp0071061,FBpp0078664,FBpp0086603,FBpp0089041,FBpp0306056	Prosalpha7,Rpn11,Rpn6,Snmp1,mys
DME-5607761	Dectin-1 mediated noncanonical NF-kB signaling	5	66	0.0038	FBpp0078664,FBpp0083434,FBpp0086603,FBpp0087921,FBpp0089041	Cul1,Prosalpha7,Rpn11,Rpn6,slmb
DME-5610780	Degradation of GLI1 by the proteasome	5	67	0.0038	FBpp0078664,FBpp0083434,FBpp0086603,FBpp0087921,FBpp0089041	Cul1,Prosalpha7,Rpn11,Rpn6,slmb
DME-5676590	NIK-->noncanonical NF-kB signaling	5	66	0.0038	FBpp0078664,FBpp0083434,FBpp0086603,FBpp0087921,FBpp0089041	Cul1,Prosalpha7,Rpn11,Rpn6,slmb
DME-5696399	Global Genome Nucleotide Excision Repair (GG-NER)	5	67	0.0038	FBpp0074841,FBpp0082743,FBpp0083658,FBpp0085619,FBpp0303869	CSN1b,CSN5,CSN6,PCNA,alien
DME-1169091	Activation of NF-kappaB in B cells	5	68	0.004	FBpp0078664,FBpp0083434,FBpp0086603,FBpp0087921,FBpp0089041	Cul1,Prosalpha7,Rpn11,Rpn6,slmb
DME-9006931	Signaling by Nuclear Receptors	5	68	0.004	FBpp0071848,FBpp0073173,FBpp0077941,FBpp0080121,FBpp0099728	Cdk9,RpII33,Rpd3,fabp,kni
DME-174084	Autodegradation of Cdh1 by Cdh1:APC/C	5	69	0.0041	FBpp0073893,FBpp0078664,FBpp0086603,FBpp0089041,FBpp0305561	Cdc27,Prosalpha7,Rpn11,Rpn6,shtd
DME-2871837	FCERI mediated NF-kB activation	5	69	0.0041	FBpp0078664,FBpp0083434,FBpp0086603,FBpp0087921,FBpp0089041	Cul1,Prosalpha7,Rpn11,Rpn6,slmb
DME-201681	TCF dependent signaling in response to WNT	6	106	0.0042	FBpp0073173,FBpp0078664,FBpp0079278,FBpp0083434,FBpp0086603,FBpp0089041	Prosalpha7,Rpd3,Rpn11,Rpn6,emb,slmb
DME-202424	Downstream TCR signaling	5	70	0.0043	FBpp0078664,FBpp0083434,FBpp0086603,FBpp0087921,FBpp0089041	Cul1,Prosalpha7,Rpn11,Rpn6,slmb
DME-382551	Transport of small molecules	12	409	0.0043	FBpp0073966,FBpp0078664,FBpp0079999,FBpp0082139,FBpp0083502,FBpp0083646,FBpp0086603,FBpp0087921,FBpp0087958,FBpp0088945,FBpp0089041,FBpp0111818	AP-2alpha,AP-2mu,AP-2sigma,CG8728,Chc,Cul1,Prosalpha7,Rpn11,Rpn6,TER94,Vha55,Vha68-2
DME-5610785	GLI3 is processed to GLI3R by the proteasome	5	72	0.0046	FBpp0078664,FBpp0083434,FBpp0086603,FBpp0087921,FBpp0089041	Cul1,Prosalpha7,Rpn11,Rpn6,slmb
DME-174178	APC/C:Cdh1 mediated degradation of Cdc20 and other APC/C:Cdh1 targeted proteins in late mitosis/early G1	5	73	0.0049	FBpp0073893,FBpp0078664,FBpp0086603,FBpp0089041,FBpp0305561	Cdc27,Prosalpha7,Rpn11,Rpn6,shtd
DME-69017	CDK-mediated phosphorylation and removal of Cdc6	5	73	0.0049	FBpp0073893,FBpp0078664,FBpp0086603,FBpp0089041,FBpp0305561	Cdc27,Prosalpha7,Rpn11,Rpn6,shtd
DME-6796648	TP53 Regulates Transcription of DNA Repair Genes	4	42	0.005	FBpp0071848,FBpp0078013,FBpp0080121,FBpp0085295	Cdk12,Cdk9,CycK,RpII33
DME-69620	Cell Cycle Checkpoints	6	112	0.005	FBpp0073893,FBpp0078664,FBpp0084831,FBpp0086603,FBpp0089041,FBpp0305561	Bub3,Cdc27,Prosalpha7,Rpn11,Rpn6,shtd
DME-141430	Inactivation of APC/C via direct inhibition of the APC/C complex	3	18	0.0051	FBpp0073893,FBpp0084831,FBpp0305561	Bub3,Cdc27,shtd
DME-9020702	Interleukin-1 signaling	5	76	0.0053	FBpp0078664,FBpp0083434,FBpp0086603,FBpp0087921,FBpp0089041	Cul1,Prosalpha7,Rpn11,Rpn6,slmb
DME-5358351	Signaling by Hedgehog	6	117	0.0058	FBpp0078664,FBpp0083434,FBpp0086603,FBpp0087921,FBpp0089041,FBpp0111818	Cul1,Prosalpha7,Rpn11,Rpn6,TER94,slmb
DME-195253	Degradation of beta-catenin by the destruction complex	5	80	0.0061	FBpp0078664,FBpp0083434,FBpp0086603,FBpp0087921,FBpp0089041	Cul1,Prosalpha7,Rpn11,Rpn6,slmb
DME-209461	Ubiquitination and degradation of phosphorylated ARM	4	46	0.0061	FBpp0078664,FBpp0086603,FBpp0087921,FBpp0089041	Cul1,Prosalpha7,Rpn11,Rpn6
DME-453279	Mitotic G1-G1/S phases	6	119	0.0061	FBpp0073173,FBpp0078664,FBpp0086603,FBpp0086853,FBpp0087921,FBpp0089041	Cul1,Dp,Prosalpha7,Rpd3,Rpn11,Rpn6
DME-72764	Eukaryotic Translation Termination	2	4	0.0061	FBpp0304202,FBpp0305302	Elf,eRF1
DME-74752	Signaling by Insulin receptor	4	46	0.0061	FBpp0079677,FBpp0079999,FBpp0082139,FBpp0082682	Akt1,Vha55,Vha68-2,chico
DME-1632852	Macroautophagy	4	47	0.0064	FBpp0070672,FBpp0074822,FBpp0083975,FBpp0290803	Atg3,Atg6,SNF4Agamma,ctp
DME-8876198	RAB GEFs exchange GTP for GDP on RABs	4	47	0.0064	FBpp0077473,FBpp0082682,FBpp0085658,FBpp0305729	Akt1,Rab35,Rab5,Rep
DME-450531	Regulation of mRNA stability by proteins that bind AU-rich elements	5	83	0.0067	FBpp0078664,FBpp0082516,FBpp0082682,FBpp0086603,FBpp0089041	Akt1,Hsc70-4,Prosalpha7,Rpn11,Rpn6
DME-6811442	Intra-Golgi and retrograde Golgi-to-ER traffic	6	123	0.0067	FBpp0070672,FBpp0074609,FBpp0080048,FBpp0082568,FBpp0082964,FBpp0084050	CG7794,Syx18,alphaSnap,beta'COP,ctp,ldlCp
DME-69275	G2/M Transition	5	83	0.0067	FBpp0078664,FBpp0079278,FBpp0086603,FBpp0087921,FBpp0089041	Cul1,Prosalpha7,Rpn11,Rpn6,emb
DME-72737	Cap-dependent Translation Initiation	6	124	0.0067	FBpp0070430,FBpp0070457,FBpp0082994,FBpp0086705,FBpp0089217,FBpp0301570	CG3806,CG8636,Tango7,eIF-1A,eIF2B-beta,eIF5B
DME-3769402	Deactivation of the beta-catenin transactivating complex	3	22	0.0069	FBpp0073173,FBpp0079278,FBpp0083434	Rpd3,emb,slmb
DME-209360	Ubiquitination and proteolysis of phosphorylated CI	4	50	0.0071	FBpp0078664,FBpp0086603,FBpp0087921,FBpp0089041	Cul1,Prosalpha7,Rpn11,Rpn6
DME-3371453	Regulation of HSF1-mediated heat shock response	4	50	0.0071	FBpp0071905,FBpp0073659,FBpp0082137,FBpp0082516	Hsc70-4,Nup214,Nup93-1,mbo
DME-179409	APC-Cdc20 mediated degradation of Nek2A	3	23	0.0074	FBpp0073893,FBpp0084831,FBpp0305561	Bub3,Cdc27,shtd
DME-2173796	SMAD2/SMAD3:SMAD4 heterotrimer regulates transcription	3	23	0.0074	FBpp0071848,FBpp0085295,FBpp0086853	Cdk9,CycK,Dp
DME-1257604	PIP3 activates AKT signaling	6	135	0.0093	FBpp0073173,FBpp0078664,FBpp0079677,FBpp0082682,FBpp0086603,FBpp0089041	Akt1,Prosalpha7,Rpd3,Rpn11,Rpn6,chico
DME-8873719	RAB geranylgeranylation	3	28	0.0116	FBpp0077473,FBpp0085658,FBpp0305729	Rab35,Rab5,Rep
DME-450408	AUF1 (hnRNP D0) binds and destabilizes mRNA	4	60	0.0121	FBpp0078664,FBpp0082516,FBpp0086603,FBpp0089041	Hsc70-4,Prosalpha7,Rpn11,Rpn6
DME-354192	Integrin alphaIIb beta3 signaling	3	29	0.0126	FBpp0071061,FBpp0082682,FBpp0086382	Akt1,mys,shark
DME-6811434	COPI-dependent Golgi-to-ER retrograde traffic	3	29	0.0126	FBpp0074609,FBpp0080048,FBpp0084050	Syx18,alphaSnap,beta'COP
DME-76002	Platelet activation, signaling and aggregation	6	146	0.0126	FBpp0071061,FBpp0082682,FBpp0086382,FBpp0087248,FBpp0302752,FBpp0306056	Akt1,Rop,Snmp1,Tsp47F,mys,shark
DME-983168	Antigen processing: Ubiquitination & Proteasome degradation	7	196	0.0126	FBpp0073893,FBpp0078664,FBpp0083434,FBpp0086603,FBpp0087921,FBpp0089041,FBpp0305561	Cdc27,Cul1,Prosalpha7,Rpn11,Rpn6,shtd,slmb
DME-3301854	Nuclear Pore Complex (NPC) Disassembly	3	30	0.0132	FBpp0071905,FBpp0073659,FBpp0082137	Nup214,Nup93-1,mbo
DME-72731	Recycling of eIF2:GDP	2	8	0.0132	FBpp0070457,FBpp0089217	CG3806,eIF2B-beta
DME-6807070	PTEN Regulation	5	104	0.0137	FBpp0073173,FBpp0078664,FBpp0082682,FBpp0086603,FBpp0089041	Akt1,Prosalpha7,Rpd3,Rpn11,Rpn6
DME-191859	snRNP Assembly	3	31	0.0139	FBpp0071905,FBpp0073659,FBpp0082137	Nup214,Nup93-1,mbo
DME-432722	Golgi Associated Vesicle Biogenesis	3	31	0.0139	FBpp0073966,FBpp0077473,FBpp0305866	Chc,Rab5,shi
DME-68886	M Phase	4	64	0.0139	FBpp0071905,FBpp0073659,FBpp0082137,FBpp0086591	Nup214,Nup93-1,SMC2,mbo
DME-8854050	FBXL7 down-regulates AURKA during mitotic entry and in early mitosis	4	64	0.0139	FBpp0078664,FBpp0086603,FBpp0087921,FBpp0089041	Cul1,Prosalpha7,Rpn11,Rpn6
DME-4551638	SUMOylation of chromatin organization proteins	3	32	0.0144	FBpp0071905,FBpp0073659,FBpp0082137	Nup214,Nup93-1,mbo
DME-187577	SCF(Skp2)-mediated degradation of p27/p21	4	66	0.0146	FBpp0078664,FBpp0086603,FBpp0087921,FBpp0089041	Cul1,Prosalpha7,Rpn11,Rpn6
DME-5358346	Hedgehog ligand biogenesis	4	66	0.0146	FBpp0078664,FBpp0086603,FBpp0089041,FBpp0111818	Prosalpha7,Rpn11,Rpn6,TER94
DME-5688426	Deubiquitination	6	156	0.0151	FBpp0076806,FBpp0078664,FBpp0083975,FBpp0086603,FBpp0089041,FBpp0111818	Atg6,Prosalpha7,Rpn11,Rpn6,TER94,scny
DME-204005	COPII-mediated vesicle transport	3	33	0.0152	FBpp0074609,FBpp0089084,FBpp0301099	Sec23,Slh,alphaSnap
DME-3371497	HSP90 chaperone cycle for steroid hormone receptors (SHR)	3	33	0.0152	FBpp0070672,FBpp0082516,FBpp0082964	CG7794,Hsc70-4,ctp
DME-538848	Degradation of CLK	3	33	0.0152	FBpp0078664,FBpp0086603,FBpp0089041	Prosalpha7,Rpn11,Rpn6
DME-8939902	Regulation of RUNX2 expression and activity	4	68	0.0155	FBpp0078664,FBpp0086603,FBpp0087921,FBpp0089041	Cul1,Prosalpha7,Rpn11,Rpn6
DME-9006934	Signaling by Receptor Tyrosine Kinases	6	160	0.0165	FBpp0071061,FBpp0079677,FBpp0079999,FBpp0080121,FBpp0082139,FBpp0082682	Akt1,RpII33,Vha55,Vha68-2,chico,mys
DME-390471	Association of TriC/CCT with target proteins during biosynthesis	2	10	0.0168	FBpp0082787,FBpp0083683	Cctgamma,T-cp1
DME-538864	Degradation of CRY	3	35	0.017	FBpp0078664,FBpp0086603,FBpp0089041	Prosalpha7,Rpn11,Rpn6
DME-8948751	Regulation of PTEN stability and activity	4	71	0.0175	FBpp0078664,FBpp0082682,FBpp0086603,FBpp0089041	Akt1,Prosalpha7,Rpn11,Rpn6
DME-216167	Nuclear CI is degraded	3	36	0.0181	FBpp0078664,FBpp0086603,FBpp0089041	Prosalpha7,Rpn11,Rpn6
DME-4615885	SUMOylation of DNA replication proteins	3	36	0.0181	FBpp0071905,FBpp0073659,FBpp0082137	Nup214,Nup93-1,mbo
DME-203765	eNOS activation and regulation	2	11	0.0192	FBpp0082682,FBpp0305866	Akt1,shi
DME-449836	Other interleukin signaling	2	11	0.0192	FBpp0292260,FBpp0302752	Rop,Syx1A
DME-9018519	Estrogen-dependent gene expression	3	37	0.0192	FBpp0071848,FBpp0073173,FBpp0080121	Cdk9,RpII33,Rpd3
DME-432524	Degradation of PER	3	38	0.02	FBpp0078664,FBpp0086603,FBpp0089041	Prosalpha7,Rpn11,Rpn6
DME-200425	Import of palmitoyl-CoA into the mitochondrial matrix	2	12	0.0211	FBpp0077941,FBpp0290803	SNF4Agamma,kni
DME-5689880	Ub-specific processing proteases	5	123	0.0219	FBpp0076806,FBpp0078664,FBpp0083975,FBpp0086603,FBpp0089041	Atg6,Prosalpha7,Rpn11,Rpn6,scny
DME-209406	Degradation of NF-kappa-B inhibitor, CACT	3	40	0.022	FBpp0078664,FBpp0086603,FBpp0089041	Prosalpha7,Rpn11,Rpn6
DME-432395	Degradation of TIM	3	40	0.022	FBpp0078664,FBpp0086603,FBpp0089041	Prosalpha7,Rpn11,Rpn6
DME-68949	Orc1 removal from chromatin	4	80	0.0236	FBpp0078664,FBpp0086603,FBpp0087921,FBpp0089041	Cul1,Prosalpha7,Rpn11,Rpn6
DME-110478	Insulin signaling pathway	2	14	0.0264	FBpp0079677,FBpp0082682	Akt1,chico
DME-1538133	G0 and Early G1	2	14	0.0264	FBpp0073173,FBpp0086853	Dp,Rpd3
DME-5673001	RAF/MAP kinase cascade	5	133	0.0285	FBpp0071061,FBpp0078664,FBpp0079677,FBpp0086603,FBpp0089041	Prosalpha7,Rpn11,Rpn6,chico,mys
DME-6814122	Cooperation of PDCL (PhLP1) and TRiC/CCT in G-protein beta folding	2	15	0.029	FBpp0082787,FBpp0083683	Cctgamma,T-cp1
DME-72165	mRNA Splicing - Minor Pathway	3	46	0.0298	FBpp0080121,FBpp0080622,FBpp0081484	CG10333,CG11985,RpII33
DME-109704	PI3K Cascade	2	16	0.0321	FBpp0079677,FBpp0082682	Akt1,chico
DME-1236973	Cross-presentation of particulate exogenous antigens (phagosomes)	2	16	0.0321	FBpp0071061,FBpp0306056	Snmp1,mys
DME-917937	Iron uptake and transport	3	49	0.0342	FBpp0079999,FBpp0082139,FBpp0087921	Cul1,Vha55,Vha68-2
DME-1236978	Cross-presentation of soluble exogenous antigens (endosomes)	3	50	0.0349	FBpp0078664,FBpp0086603,FBpp0089041	Prosalpha7,Rpn11,Rpn6
DME-176407	Conversion from APC/C:Cdc20 to APC/C:Cdh1 in late anaphase	2	17	0.0349	FBpp0073893,FBpp0305561	Cdc27,shtd
DME-176412	Phosphorylation of the APC/C	2	17	0.0349	FBpp0073893,FBpp0305561	Cdc27,shtd
DME-210991	Basigin interactions	2	17	0.0349	FBpp0071061,FBpp0293235	Nup358,mys
DME-983231	Factors involved in megakaryocyte development and platelet production	3	50	0.0349	FBpp0073173,FBpp0077134,FBpp0077473	HP6,Rab5,Rpd3
DME-163841	Gamma carboxylation, hypusine formation and arylsulfatase activation	2	18	0.0365	FBpp0072081,FBpp0305182	EF2,eIF-5A
DME-77595	Processing of Intronless Pre-mRNAs	2	18	0.0365	FBpp0076433,FBpp0084726	CG7185,Cpsf100
DME-110320	Translesion Synthesis by POLH	2	19	0.0393	FBpp0085619,FBpp0111818	PCNA,TER94
DME-2559582	Senescence-Associated Secretory Phenotype (SASP)	2	19	0.0393	FBpp0073893,FBpp0305561	Cdc27,shtd
DME-72695	Formation of the ternary complex, and subsequently, the 43S complex	3	55	0.0416	FBpp0070430,FBpp0082994,FBpp0086705	CG8636,Tango7,eIF-1A
DME-114608	Platelet degranulation	4	101	0.0424	FBpp0071061,FBpp0087248,FBpp0302752,FBpp0306056	Rop,Snmp1,Tsp47F,mys
DME-5658442	Regulation of RAS by GAPs	3	56	0.0431	FBpp0078664,FBpp0086603,FBpp0089041	Prosalpha7,Rpn11,Rpn6
DME-6782135	Dual incision in TC-NER	3	56	0.0431	FBpp0080121,FBpp0085619,FBpp0085902	PCNA,Prp19,RpII33
DME-69229	Ubiquitin-dependent degradation of Cyclin D1	3	56	0.0431	FBpp0078664,FBpp0086603,FBpp0089041	Prosalpha7,Rpn11,Rpn6
DME-174048	APC/C:Cdc20 mediated degradation of Cyclin B	2	21	0.0439	FBpp0073893,FBpp0305561	Cdc27,shtd
DME-6811558	PI5P, PP2A and IER3 Regulate PI3K/AKT Signaling	2	21	0.0439	FBpp0079677,FBpp0082682	Akt1,chico
DME-112382	Formation of RNA Pol II elongation complex	3	58	0.045	FBpp0071848,FBpp0080121,FBpp0085295	Cdk9,CycK,RpII33
DME-4641257	Degradation of AXIN	3	58	0.045	FBpp0078664,FBpp0086603,FBpp0089041	Prosalpha7,Rpn11,Rpn6
DME-4641258	Degradation of DVL	3	58	0.045	FBpp0078664,FBpp0086603,FBpp0089041	Prosalpha7,Rpn11,Rpn6
DME-69601	Ubiquitin Mediated Degradation of Phosphorylated Cdc25A	3	58	0.045	FBpp0078664,FBpp0086603,FBpp0089041	Prosalpha7,Rpn11,Rpn6
DME-4608870	Asymmetric localization of PCP proteins	3	59	0.0454	FBpp0078664,FBpp0086603,FBpp0089041	Prosalpha7,Rpn11,Rpn6
DME-382556	ABC-family proteins mediated transport	4	108	0.0475	FBpp0078664,FBpp0086603,FBpp0089041,FBpp0111818	Prosalpha7,Rpn11,Rpn6,TER94
DME-445355	Smooth Muscle Contraction	2	23	0.0484	FBpp0071061,FBpp0072306	mys,zip
